# Supplementary material
Source: PubMed Central journal article supplement (PMC7906781)

Figure S1. Ependymal cells are reduced and displaced in MPP5 het CKO cortices

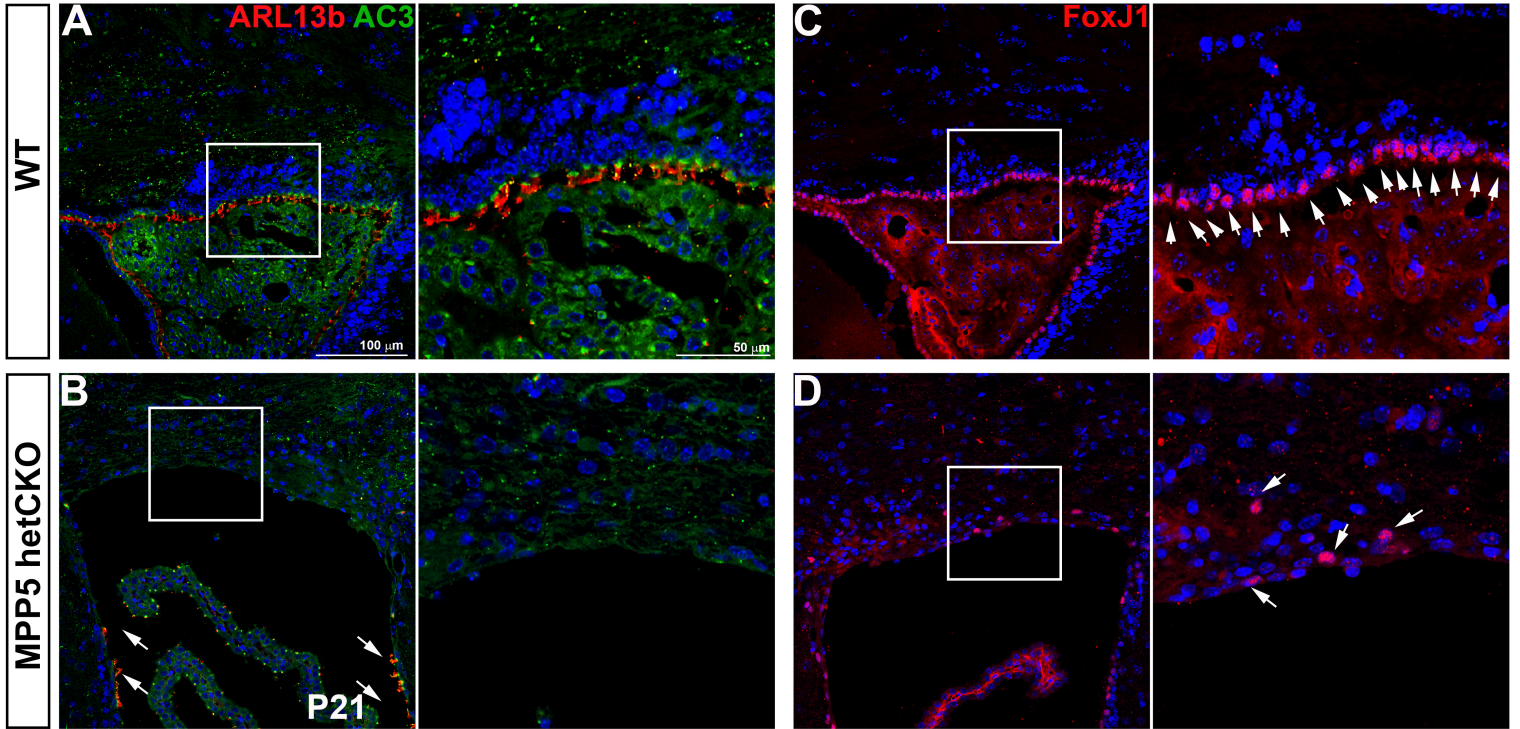

Figure S2. MPP5 heterozygous CKO mice show hypoplastic cerebellum without disrupted lamina organization

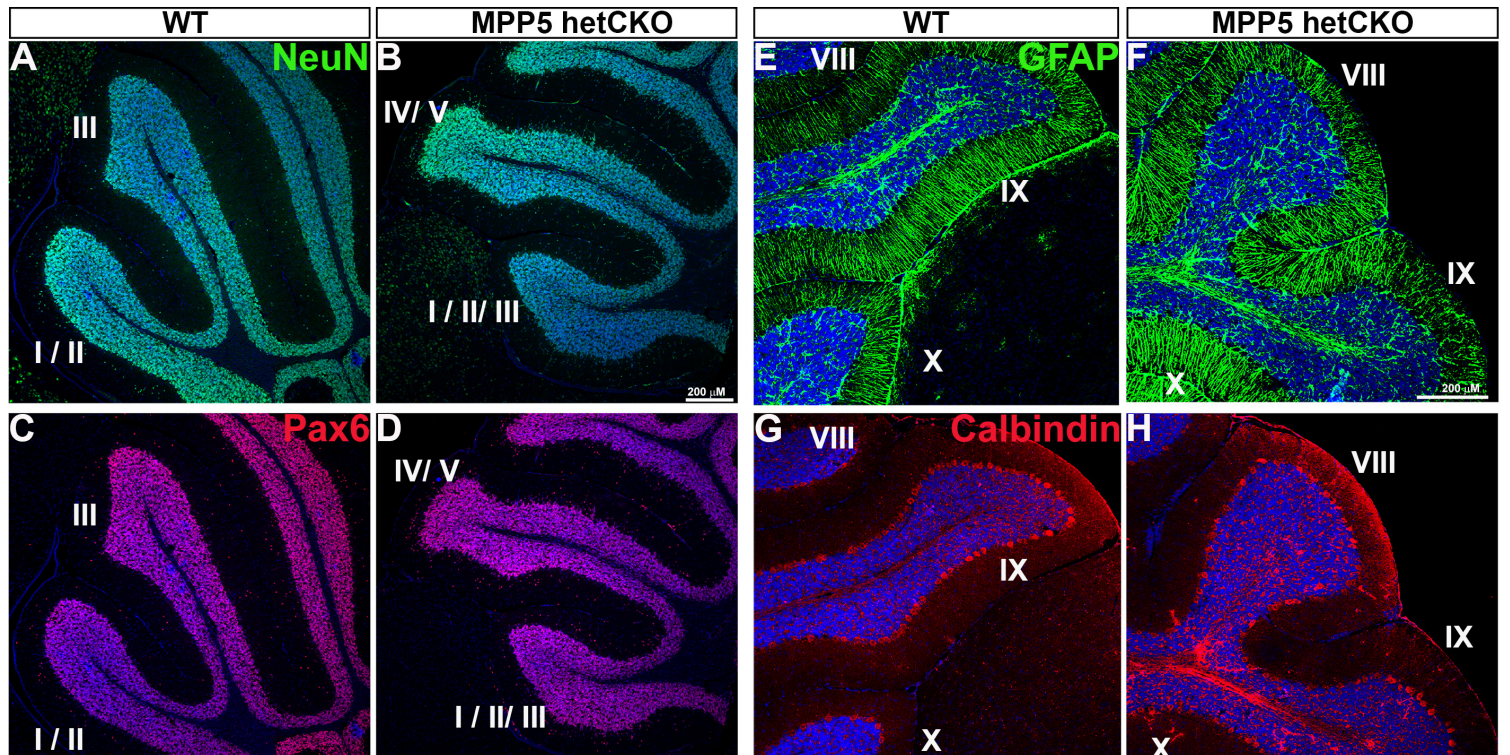

**Figure S3. Cortical progenitors are drastically decreased in MPP5 het CKO**

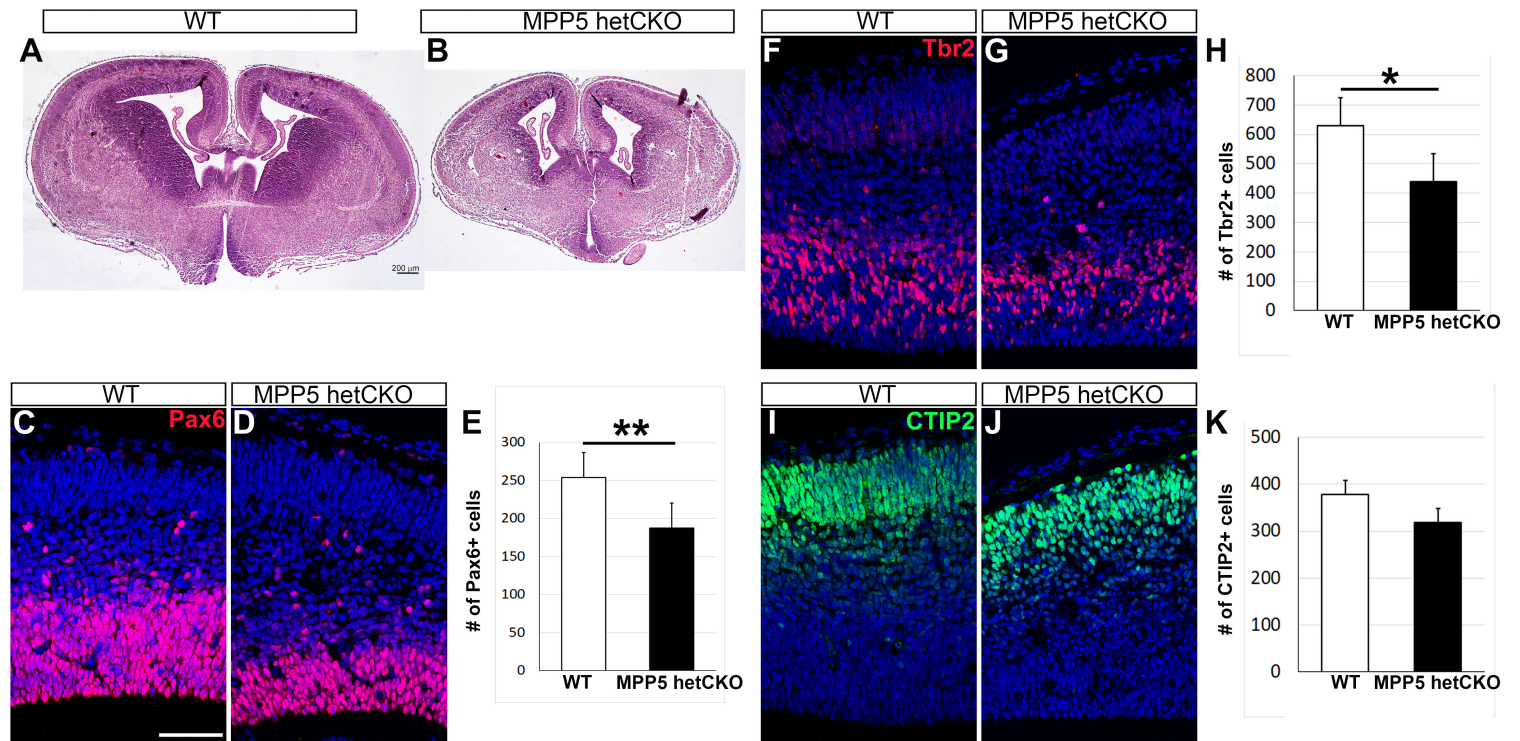

Supplement: supplemental_figures_ddaa224.pdf [file supplemental_figures_ddaa224.pdf]
